# Supplementary material for: Sodium Alginate/Chitosan-Coated Liposomes for Oral Delivery of Hydroxy-α-Sanshool: In Vitro and In Vivo Evaluation
Source: MDPI journal article supplement (doi:10.3390/pharmaceutics15072010), 2023-07-24
Supplement: s1 [file s1]

## **Supplementary Method**

Optimization of SA/CH-HAS-LIP formulation

**Supplementary Table S1** Optimization of concentrations of CH and SA for preparation of SA/CH-HAS-LIP

**Supplementary Figure S1** Particle size (a), and zeta potential (b) of HAS-LIP, CH-HAS-LIP and SA/CH-HAS-LIP

## **Supplementary Method**

### **Optimization of SA/CH-HAS-LIP formulation**

The concentrations of CH and SA were optimized by the parameters of particle size, PDI, zeta potential, encapsulation efficiency, and sedimentation efficiency, respectively.

As the results shown in Table S1, a similar EE% was obtained from CH-HAS-LIP formulation in the cases of 0.6% and 0.8% CH. However, some flocculation could be found in the liposome coated with 0.8% of CH after storage for 48 h. Therefore, 0.6% of CH was selected as the first coating layer of HAS-LIP in the following experiments. Besides, compared to the other concentrations of SA, the liposome coated with 0.4% of SA exhibited small particle size, positive zeta potential value and low sedimentation efficiency. Hence, the appropriate concentration of SA for the following coating purpose was 0.4%.

**Table S1.** Optimization of concentrations of CH and SA for preparation of SA/CH-HAS-LIP

|                   | Concentrations<br>of polymer (%<br>w/v) | Particle size<br>(nm)                | Zeta potential<br>(mV)            | Encapsulation<br>efficiency (%)    | Sedimentation<br>efficiency (%)    |
|-------------------|-----------------------------------------|--------------------------------------|-----------------------------------|------------------------------------|------------------------------------|
| CH-HAS<br>-LIP    | 0.2                                     | 135.13 $\pm$ 5.74                    | 38.6 $\pm$ 0.6                    | 84.13 $\pm$ 1.85                   |                                    |
|                   | 0.4                                     | 175.95 $\pm$ 6.95                    | 40.2 $\pm$ 0.6                    | 89.40 $\pm$ 1.30                   |                                    |
|                   | <b>0.6</b>                              | <b>214.89 <math>\pm</math> 4.93</b>  | <b>53.7 <math>\pm</math> 0.4</b>  | <b>96.17 <math>\pm</math> 1.84</b> |                                    |
|                   | 0.8                                     | 304.84 $\pm$ 8.69                    | 60.9 $\pm$ 0.3                    | 95.88 $\pm$ 1.53                   |                                    |
|                   | 1.0                                     | 543.01 $\pm$ 10.48                   | 65.5 $\pm$ 0.4                    | 95.18 $\pm$ 1.23                   |                                    |
|                   | 2.0                                     | 680.88 $\pm$ 15.91                   | 68.8 $\pm$ 0.2                    | 96.01 $\pm$ 1.06                   |                                    |
| SA/CH-<br>HAS-LIP | 0.1                                     | 353.73 $\pm$ 11.68                   | 41.0 $\pm$ 0.2                    |                                    | 2.92 $\pm$ 0.09                    |
|                   | 0.2                                     | 447.03 $\pm$ 8.96                    | 29.7 $\pm$ 0.3                    |                                    | 7.30 $\pm$ 0.07                    |
|                   | <b>0.4</b>                              | <b>533.71 <math>\pm</math> 12.39</b> | <b>-41.7 <math>\pm</math> 0.2</b> |                                    | <b>28.49 <math>\pm</math> 0.15</b> |
|                   | 0.6                                     | 815.95 $\pm$ 15.61                   | -65.5 $\pm$ 0.2                   |                                    | 40.09 $\pm$ 0.24                   |
|                   | 0.8                                     | 2763 $\pm$ 23.23                     | -70.9 $\pm$ 0.1                   |                                    | 57.9 $\pm$ 0.23                    |
|                   | 1.0                                     | 3615 $\pm$ 10.75                     | -74.2 $\pm$ 0.1                   |                                    | 62.31 $\pm$ 0.16                   |

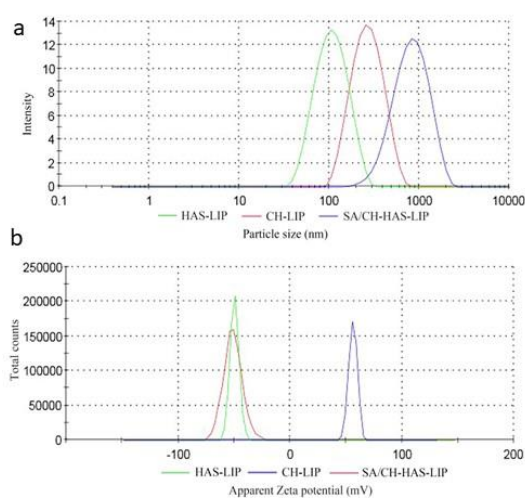

**Figure S1.** Particle size (a), and zeta potential (b) of HAS-LIP, CH-HAS-LIP and SA/CH-HAS-LIP
